# Supplementary material
Source: publisher site journal article supplement (https://www.spandidos-publications.com/4533/downloadSupplementary)
Supplement: Supplementary file 1 [file downloadSupplementary]

Table SI. Sequences of primers.

| Gene    | Primer sequences (5'→3') |
|---------|--------------------------|
| PDGF-BB | F: ACTTGAACATGACCCGAGCA  |
|         | R: GAACACCTCTGTACGCGTCT  |
| VEGF    | F: GTCGGAGAGCAACGTCACTA  |
|         | R: TCGCCTTTCGTTTTTGACCC  |
| RUNX2   | F: GCTTGATGACTCTAAACCTA  |
|         | R: AAAAAGGGCCCAGTTCTGAA  |
| OSX     | F: GAAGAAGCTCACTATGGCTC  |
|         | R: GAAAAGCCAGTTGCAGACGA  |
| β-actin | F: ATATCGCTGCGCTGGTCGTC  |
|         | R: AGGATGGCGTGAGGGAGAGC  |

F, forward; R, reverse; PDGF, platelet-derived growth factor; RUNX2, runt-related transcription factor 2; OSX, Osterix.

Table SII. Raw data for the type H vessel area presented in Fig. 3B.

| Group           | Type H vessel area, %     |
|-----------------|---------------------------|
| TFRD            | 6.127±0.603 <sup>ab</sup> |
| TFRD+PDGF-BB-Ab | 3.667±0.495 <sup>ab</sup> |
| PDGF-BB-Ab      | 0.591±0.033 <sup>a</sup>  |
| CON             | 1.985±0.302               |

The data are expressed as the mean ± SD of three independent experiments. <sup>a</sup>P<0.05 vs. control group; <sup>b</sup>P<0.05 vs. PDGF-BB-Ab group. TFRD, total flavonoids of *Rhizoma drynariae*; PDGF, platelet-derived growth factor.

Table SIII. Raw data for the angiography and micro-CT analyses presented in Fig. 4B and D.

| Group           | Vessel volume, mm <sup>3</sup> | BV/TV, %                 |
|-----------------|--------------------------------|--------------------------|
| TFRD            | 0.297±0.010 <sup>ab</sup>      | 53.77±0.31 <sup>ab</sup> |
| TFRD+PDGF-BB-Ab | 0.185±0.006 <sup>ab</sup>      | 44.95±0.46 <sup>ab</sup> |
| PDGF-BB-Ab      | 0.058±0.003 <sup>a</sup>       | 22.18±0.93 <sup>a</sup>  |
| CON             | 0.126±0.005                    | 34.46±0.80               |

The data are expressed as the mean ± SD of three independent experiments. <sup>a</sup>P<0.05 vs. control group; <sup>b</sup>P<0.05 vs. PDGF-BB-Ab group. TFRD, total flavonoids of *Rhizoma drynariae*; PDGF, platelet-derived growth factor; BV/TV, bone tissue volume/total tissue volume.

Table SIV. Raw data for the total tube length and the number of migrated cells presented in Fig. 5C and D.

| Group           | Total tube length, mm     | Migrated cells, n          |
|-----------------|---------------------------|----------------------------|
| TFRD            | 8.922±0.904 <sup>ab</sup> | 98.239±9.667 <sup>ab</sup> |
| TFRD+PDGF-BB-Ab | 6.721±0.695 <sup>ab</sup> | 63.405±8.333 <sup>ab</sup> |
| PDGF-BB-Ab      | 2.239±0.306 <sup>a</sup>  | 27.009±5.216 <sup>a</sup>  |
| CON             | 4.758±0.533               | 45.207±7.333               |

The data are expressed as the mean ± SD of three independent experiments. <sup>a</sup>P<0.05 vs. control group; <sup>b</sup>P<0.05 vs. PDGF-BB-Ab group. TFRD, total flavonoids of *Rhizoma drynariae*; PDGF, platelet-derived growth factor.

Table SV. Raw data for the quantification of ALP activity and PA/TA presented in Fig. 5F and H.

| Group           | ALP activity, fold-change | PA/TA, %                  |
|-----------------|---------------------------|---------------------------|
| TFRD            | 4.330±0.518 <sup>ab</sup> | 0.817±0.102 <sup>ab</sup> |
| TFRD+PDGF-BB-Ab | 2.679±0.367 <sup>ab</sup> | 0.618±0.071 <sup>ab</sup> |
| PDGF-BB-Ab      | 0.535±0.103 <sup>a</sup>  | 0.245±0.036 <sup>a</sup>  |
| CON             | 1.000±0.000               | 0.467±0.053               |

The data are expressed as the mean ± SD of three independent experiments. <sup>a</sup>P<0.05 vs. control group; <sup>b</sup>P<0.05 vs. PDGF-BB-Ab group. TFRD, total flavonoids of *Rhizoma drynariae*; PDGF, platelet-derived growth factor; ALP, alkaline phosphatase; PA/TA, positive area/total area.

Table SVI. Raw data for the immunofluorescence analyses of RUNX2, OSX, CD31 and PDGF-BB presented in Fig. 6B.

| Group           | RUNX2                     | OSX                       | CD31                      | PDGF-BB                   |
|-----------------|---------------------------|---------------------------|---------------------------|---------------------------|
| TFRD            | 9.612±0.819 <sup>ab</sup> | 7.471±0.695 <sup>ab</sup> | 6.115±0.603 <sup>ab</sup> | 4.809±0.393 <sup>ab</sup> |
| TFRD+PDGF-BB-Ab | 3.117±0.581 <sup>ab</sup> | 3.636±0.532 <sup>b</sup>  | 3.518±0.498 <sup>b</sup>  | 3.027±0.334 <sup>b</sup>  |
| PDGF-BB-Ab      | 0.525±0.333 <sup>a</sup>  | 0.467±0.272 <sup>a</sup>  | 0.410±0.367 <sup>a</sup>  | 0.351±0.135 <sup>a</sup>  |
| CON             | 1.000±0.000               | 1.000±0.000               | 1.000±0.000               | 1.000±0.000               |

The data are expressed as the mean ± SD of three independent experiments. <sup>a</sup>P<0.05 vs. control group; <sup>b</sup>P<0.05 vs.

PDGF-BB-Ab group. TFRD, total flavonoids of *Rhizoma drynariae*; PDGF, platelet-derived growth factor;

RUNX2, runt-related transcription factor 2; OSX, Osterix.

Table SVII. Raw data for the western blotting analyses of PDGF-BB, VEGF, RUNX2 and OSX presented in Fig. 6D.

| Group           | PDGF-BB                   | VEGF                      | RUNX2                     | OSX                       |
|-----------------|---------------------------|---------------------------|---------------------------|---------------------------|
| TFRD            | 0.897±0.054 <sup>ab</sup> | 1.115±0.039 <sup>ab</sup> | 0.853±0.047 <sup>ab</sup> | 0.836±0.049 <sup>ab</sup> |
| TFRD+PDGF-BB-Ab | 0.631±0.033 <sup>ab</sup> | 0.753±0.042 <sup>b</sup>  | 0.591±0.019 <sup>b</sup>  | 0.642±0.029 <sup>b</sup>  |
| PDGF-BB-Ab      | 0.104±0.007 <sup>a</sup>  | 0.216±0.010 <sup>a</sup>  | 0.315±0.014 <sup>a</sup>  | 0.225±0.012 <sup>a</sup>  |
| CON             | 0.414±0.016               | 0.715±0.038               | 0.515±0.018               | 0.652±0.036               |

The data are expressed as the mean ± SD of three independent experiments. <sup>a</sup>P<0.05 vs. control group; <sup>b</sup>P<0.05 vs. PDGF-BB-Ab group. TFRD, total flavonoids of *Rhizoma drynariae*; PDGF, platelet-derived growth factor; RUNX2, runt-related transcription factor 2; OSX, Osterix.

Table SVIII. Raw data for the reverse transcription-quantitative PCR analysis of PDGF-BB, VEGF, RUNX2 and OSX presented in Fig. 6E.

| Group           | PDGF-BB                   | VEGF                      | RUNX2                     | OSX                       |
|-----------------|---------------------------|---------------------------|---------------------------|---------------------------|
| TFRD            | 1.369±0.138 <sup>ab</sup> | 1.543±0.203 <sup>ab</sup> | 1.329±0.202 <sup>ab</sup> | 2.166±0.289 <sup>ab</sup> |
| TFRD+PDGF-BB-Ab | 1.174±0.116 <sup>ab</sup> | 1.265±0.173 <sup>ab</sup> | 0.920±0.233 <sup>b</sup>  | 1.413±0.254 <sup>b</sup>  |
| PDGF-BB-Ab      | 0.313±0.043 <sup>a</sup>  | 0.614±0.075 <sup>a</sup>  | 0.301±0.015 <sup>a</sup>  | 0.579±0.027 <sup>a</sup>  |
| CON             | 0.958±0.122               | 1.070±0.181               | 0.847±0.161               | 1.383±0.213               |

The data are expressed as the mean ± SD of three independent experiments. <sup>a</sup>P<0.05 vs. control group; <sup>b</sup>P<0.05 vs. PDGF-BB-Ab group. TFRD, total flavonoids of *Rhizoma drynariae*; PDGF, platelet-derived growth factor; RUNX2, runt-related transcription factor 2; OSX, Osterix.
